# Supplementary material
Source: PubMed Central journal article supplement (PMC3797171)
Supplement: NIHMS470227-supplement-1.pdf [file NIHMS470227-supplement-1.pdf]

**Figure 2S. Median mobilization and aphaeresis costs**

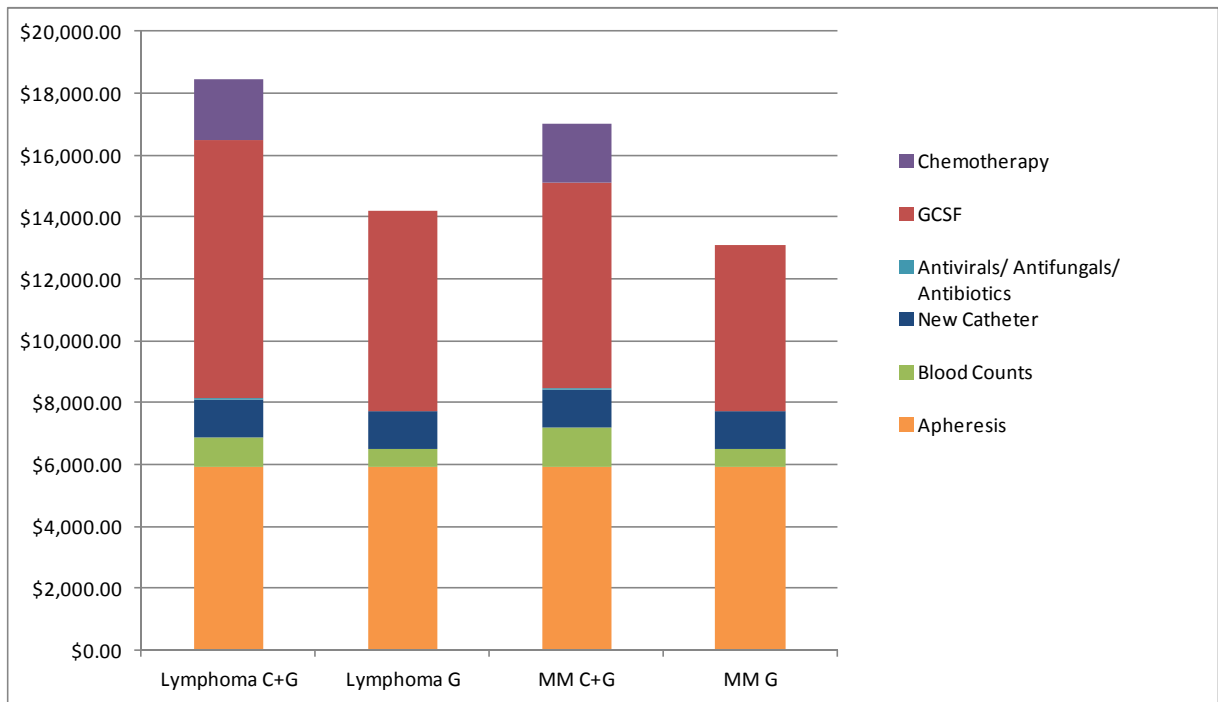

Figure S2: Costs of mobilization and aphaeresis after mobilization with chemotherapy + granulocyte colony stimulating factor (C+G) or granulocyte colony stimulating factor alone (G) for patients with lymphoma and multiple myeloma (MM). Note that costs of physician time are included in granulocyte colony stimulating factor and chemotherapy costs and costs of lab processing and cryopreservation are included in aphaeresis costs

**Figure S3a. Median transplant costs (outpatient)**

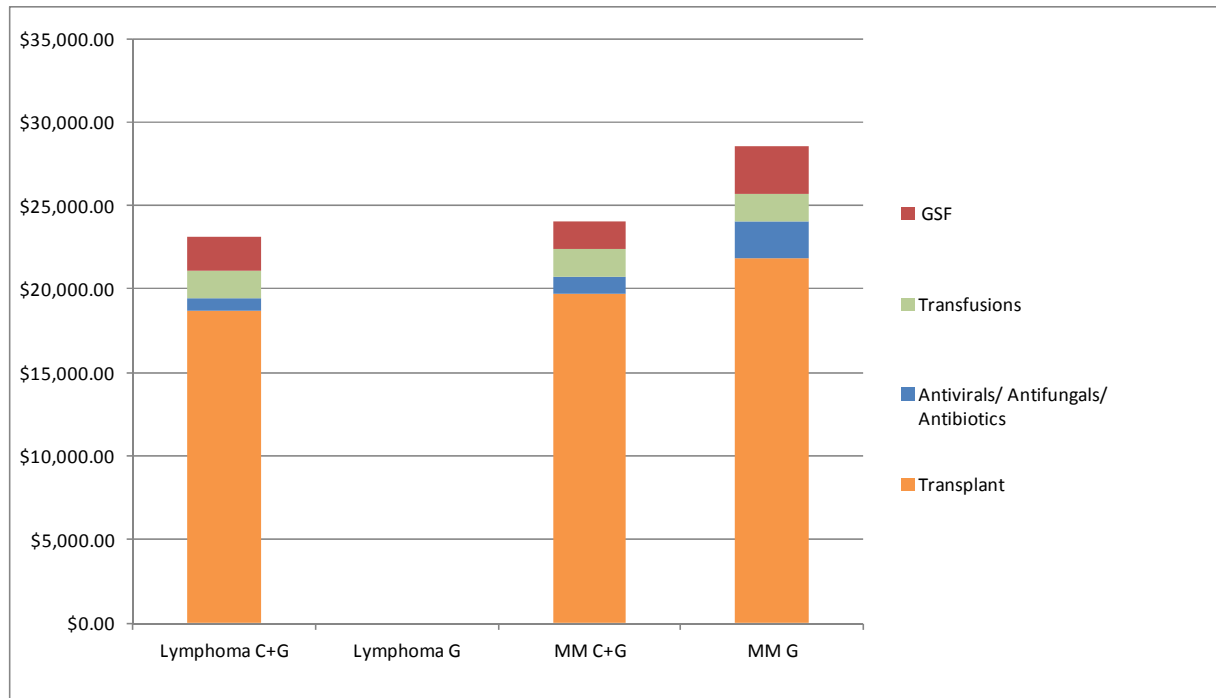

Figure S3a: Outpatient transplant costs after mobilization with chemotherapy + granulocyte colony stimulating factor (C+G) or granulocyte colony stimulating factor alone (G or G-CSF) for patients with lymphoma and multiple myeloma (MM). Note that costs of infusion, hospitalization, hotel stay, blood work, and clinic visits are included in transplant costs. Note that no lymphoma patients who were mobilized with G-CSF were transplanted as outpatients.

**Figure S3b. Median transplant costs (inpatient)**

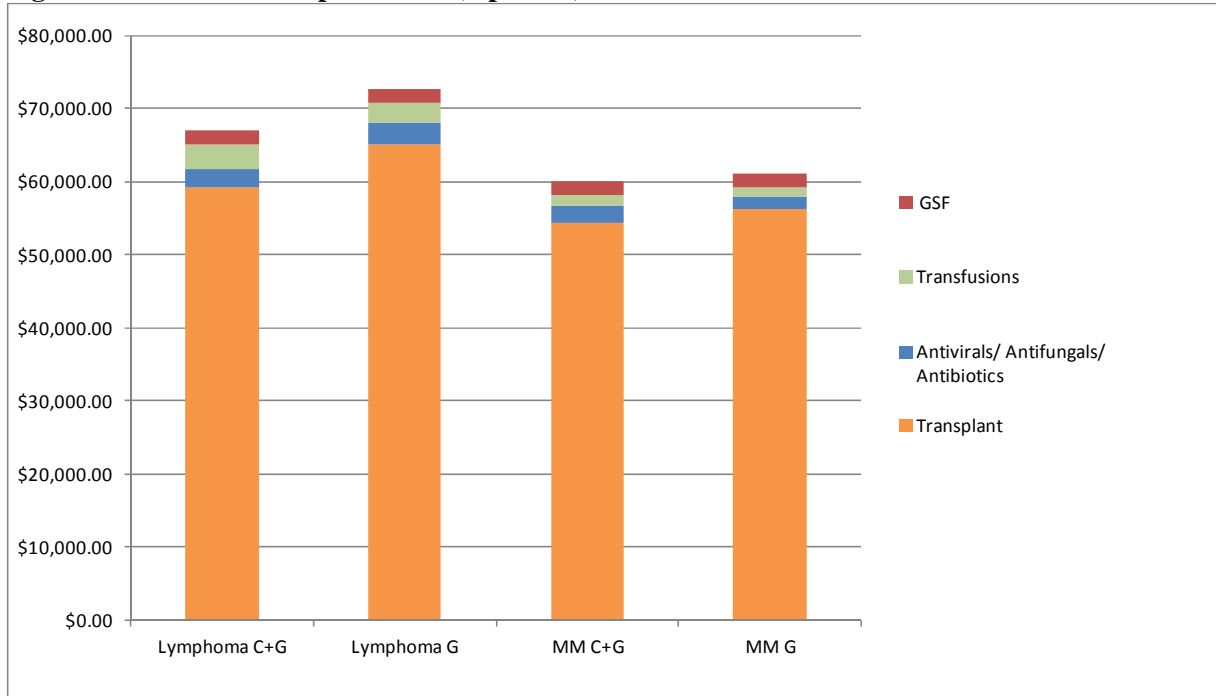

Figure S3b: Inpatient transplant costs after mobilization with chemotherapy + granulocyte colony stimulating factor (C+G) or granulocyte colony stimulating factor alone (G or G-CSF) for patients with lymphoma and multiple myeloma (MM). Note that costs of infusion, hospitalization, hotel stay, blood work, and clinic visits are included in transplant costs.
